# Supplementary material for: Upregulation of Nrf2 and Decreased Redox Signaling Contribute to Renoprotective Effects of Chemerin Receptor Blockade in Diabetic Mice
Source: PubMed Central journal article supplement (PMC6121242; doi:10.3390/ijms19082454), 2018-08-19
Supplement: ijms-19-02454-s001.pdf [file ijms-19-02454-s001.pdf]

# Supplementary Materials: Upregulation of Nrf2 and Decreased Redox Signaling Contribute to Renoprotective Effects of Chemerin Receptor Blockade in Diabetic Mice

Karla Bianca Neves, Augusto Cesar Montezano, Rheure Alves-Lopes, Thiago Bruder-Nascimento, Rafael Menezes da Costa, Roberto S Costa, Rhian M Touyz and Rita C Tostes

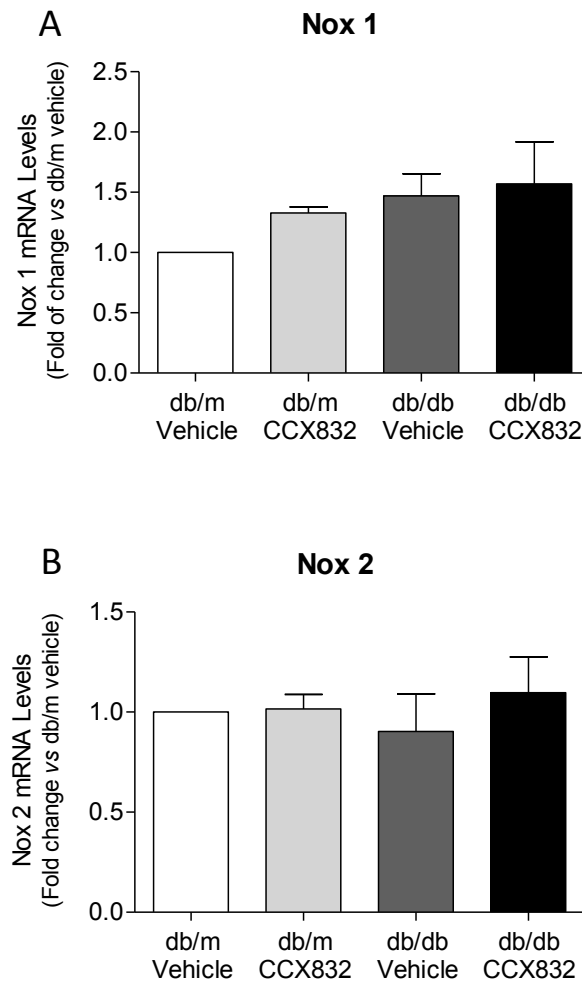

**Figure S1.** ChemR23 antagonism does not change Nox1 or Nox2 expression in kidneys from db/db mice. mRNA expression of Nox1 (A) and Nox2 (B) was determined by real time PCR. The values were normalized by GAPDH mRNA expression. Results represent the mean  $\pm$  SEM of 5 to 6 experiments. .
